# Supplementary material for: Lid Margin Microbiome in Stevens-Johnson Syndrome Patients With Lid Margin Keratinization and Severe Dry Eye Disease
Source: PubMed Central journal article supplement (PMC11193065; doi:10.1167/iovs.65.6.28), 2024-06-18
Supplement: iovs-65-6-28_s001.pdf [file iovs-65-6-28_s001.pdf]

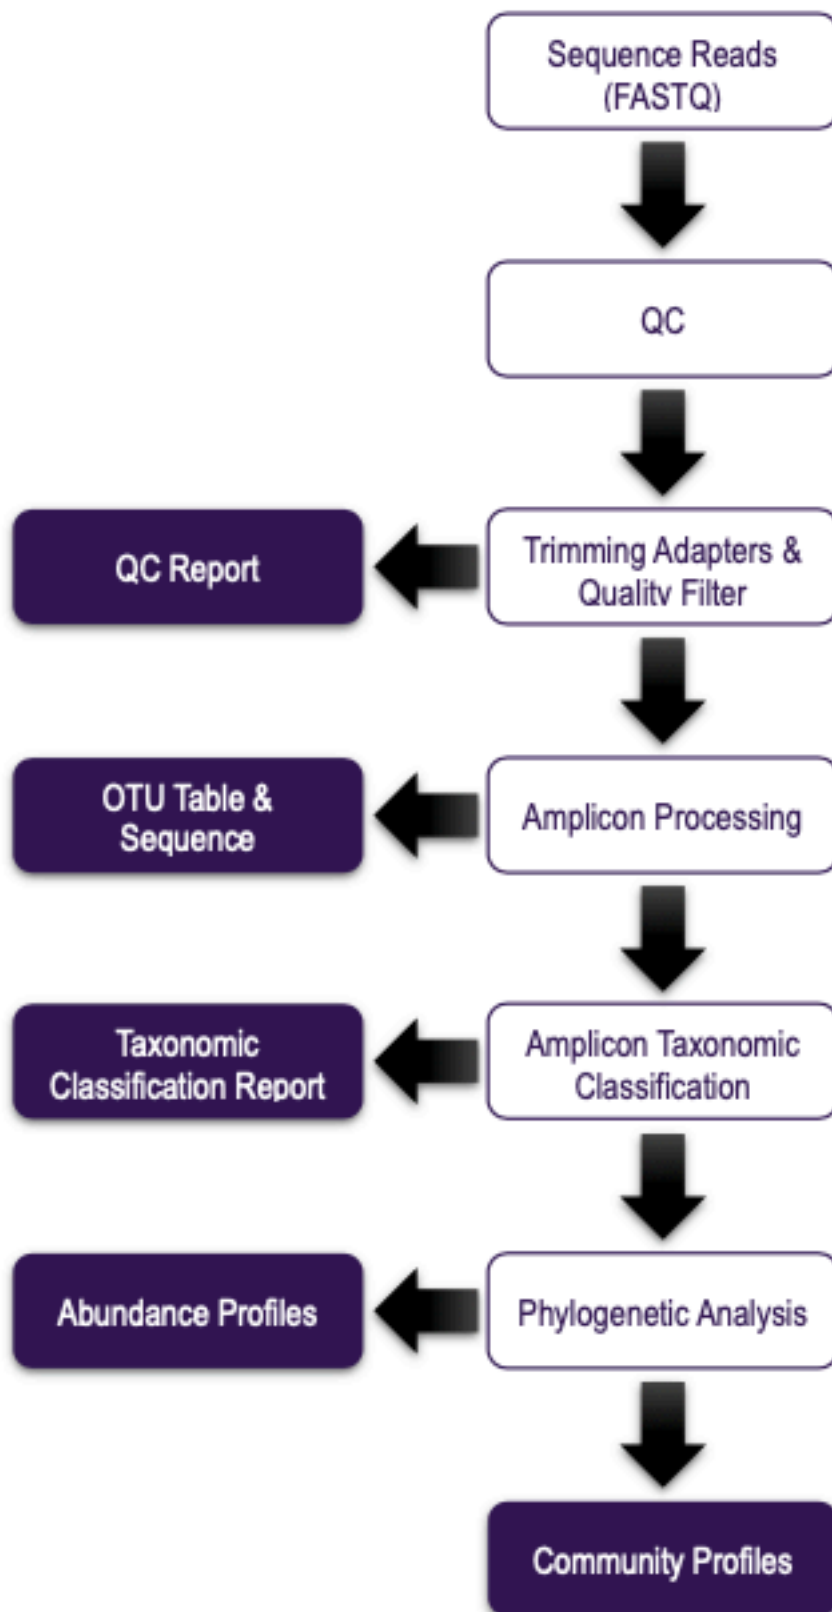

Supplementary File 1: Analysis workflow of the analyzed lid margin samples.
