# Supplementary material for: Lid Margin Microbiome in Stevens-Johnson Syndrome Patients With Lid Margin Keratinization and Severe Dry Eye Disease
Source: PubMed Central journal article supplement (PMC11193065; doi:10.1167/iovs.65.6.28), 2024-06-18
Supplement: iovs-65-6-28_s003.pdf [file iovs-65-6-28_s003.pdf]

| Genera      | log2FC   | p_value |
|-------------|----------|---------|
| Bacillus    | -7.4794  | <0.001  |
| Caulobacte  | -5.58688 | <0.002  |
| Curvibacte  | -3.26377 | <0.003  |
| Hydrotalea  | -2.95782 | <0.004  |
| Lacunispha  | -4.41426 | <0.005  |
| Sediminiba  | -5.7243  | <0.006  |
| Staphyloco  | -4.38334 | <0.007  |
| Afipia      | 3.648374 | 0.001   |
| Bradyrhizol | -4.04927 | 0.001   |
| Ga0074140   | -2.15459 | 0.001   |
| Novosphinj  | -4.61268 | 0.001   |
| Reyranelia  | -3.27414 | 0.001   |
| Microbacte  | -2.52903 | 0.002   |
| Pseudomor   | -1.16874 | 0.002   |
| Cricetibact | 0.141522 | 0.004   |
| Prevotellac | -3.10431 | 0.004   |
| Ralstonia   | -4.5716  | 0.004   |
| Candidatus  | -2.9729  | 0.012   |
| Haemophil   | 4.784276 | 0.013   |
| Corynebact  | 3.627119 | 0.023   |
| Acinetobac  | -1.14602 | 0.047   |
| Aquamona    | 0.847978 | 0.047   |
| Azotobacte  | 3.446703 | 0.047   |
| Oligotroph  | 2.989556 | 0.047   |
| Pseudamin   | 2.768095 | 0.047   |
| Stakelama   | 1.3405   | 0.047   |
| Stenoxybac  | 0.7427   | 0.047   |

Supplementary File 3: Raw data of Log2 fold change in abundance of various genera between SJS (Group 2) versus healthy (Group 1) lid margins with P value.
